# Supplementary material for: Coexistence of blaOXA-58 and tet(X) on a Novel Plasmid in Acinetobacter sp. From Pig in Shanghai, China
Source: PubMed Central journal article supplement (PMC7530245; doi:10.3389/fmicb.2020.578020), 2020-09-18
Supplement: Data_Sheet_1.pdf [file Data_Sheet_1.pdf]

**Table S1.** Plasmids of SH19PTT10

| Plasmid    | Size (bp) | Resistance genes                                                                                                                                                                                                                                                                           | Closest match of <i>rep</i> : plasmid<br>(identity) | <i>rep</i> group |
|------------|-----------|--------------------------------------------------------------------------------------------------------------------------------------------------------------------------------------------------------------------------------------------------------------------------------------------|-----------------------------------------------------|------------------|
| pYUSHP10-1 | 174,032   | <i>aac(3)-IId</i> , <i>aadA1</i> , <i>aadA2</i> , <i>aph(3')-Ia</i> ,<br><i>bla<sub>CARB-2</sub></i> , <i>bla<sub>OXA-58</sub></i> , <i>cmlA1</i> , <i>dfrA16</i> , <i>floR</i> ,<br><i>mph(E)</i> , <i>msr(E)</i> , <i>strA</i> , <i>strB</i> , <i>sul2</i> , <i>sul3</i> , <i>tet(X)</i> | first <i>rep</i> : pAB17H194-1 (99.9%)              | new              |
|            |           |                                                                                                                                                                                                                                                                                            | second <i>rep</i> : pXBB1-9 (100.0%)                | new              |
| pYUSHP10-2 | 17,299    | none                                                                                                                                                                                                                                                                                       | pALWED1.3 (99.6%)                                   | new              |
| pYUSHP10-3 | 8,312     | <i>tet(39)</i>                                                                                                                                                                                                                                                                             | p537 (95.9%)                                        | GR5              |
| pYUSHP10-4 | 8,168     | none                                                                                                                                                                                                                                                                                       | /                                                   | new              |
| pYUSHP10-5 | 5,738     | none                                                                                                                                                                                                                                                                                       | <i>rep</i> undetermined                             | /                |

**Table S2** Number of *pdif* sites identified in *Acinetobacter* plasmids

| <b>Plasmid<sup>a</sup></b> | <b>Size (bp)</b> | <b><i>pdif</i> sites</b> | <b>Source</b>            | <b>Accession number</b> |
|----------------------------|------------------|--------------------------|--------------------------|-------------------------|
| pS30-1                     | 18,234           | 8                        | <i>A. baumannii</i>      | KY617771                |
| pXBB1-9                    | 398,857          | 12                       | <i>A. johnsonii</i>      | CP010351                |
| pABIR                      | 29,823           | 13                       | <i>A. baumannii</i>      | EU294228                |
| p255n_1                    | 92,939           | 9                        | <i>A. baumannii</i>      | KT852971                |
| pC54_001                   | 256,887          | 9                        | <i>A. pittii</i>         | CP042365                |
| pAP43-OXA58-NDM1           | 268,263          | 10                       | <i>A. pittii</i>         | CP043053                |
| p19110F47-2                | 143,035          | 11                       | <i>A. townneri</i>       | CP046044                |
| p34AB                      | 277,864          | 6                        | <i>A. baumannii</i>      | MK134375                |
| pAl01                      | 116,992          | 4                        | <i>A. indicus</i>        | CP044019                |
| <b>pYUSHP10-1</b>          | 174,032          | 17                       | <i>Acinetobacter</i> sp. | MT107270                |

a. Plasmid with name in bold typeface is obtained in this study.

**Table S3 The *pdif* sites found in pYUSHP10-1**

| <i>pdif</i> sites <sup>a</sup> | Site sequence (5'-3') <sup>b</sup><br>XerC-XerD | Position in pYUSHP10-1<br>(bp) |
|--------------------------------|-------------------------------------------------|--------------------------------|
| <i>pdif</i> -1*                | <u>ACTTCGTATAA</u> TAGTGA <u>TTATGTTAAAT</u>    | 4,962-4,989                    |
| <i>pdif</i> -2*                | <u>ATTGCGTATAA</u> CCACCA <u>TTATGTTAAAT</u>    | 9,940-9,967                    |
| <i>pdif</i> -3                 | <u>AATTCGTATAA</u> CCACCA <u>TTATGTTAAAT</u>    | 11,600-11,627                  |
| <i>pdif</i> -4*                | <u>ATTTTGTATAA</u> GGTGT <u>TTATGTTAATT</u>     | 28,179-28,206                  |
| <i>pdif</i> -5                 | <u>GTTTCGTATAA</u> CAGCCA <u>TTATGTTAAAT</u>    | 30,464-30,491                  |
| <i>pdif</i> -6*                | <u>ATTACGTATAA</u> CGTGT <u>TTATGTTAATT</u>     | 40,394-40,421                  |
| <i>pdif</i> -7                 | <u>ATTACGTATAA</u> GGTGT <u>TTATGTTAATT</u>     | 45,473-45,500                  |
| <i>pdif</i> -8*                | <u>ATTTTCGTATAA</u> CGCCCA <u>TTATGTTAAAT</u>   | 46,710-46,737                  |
| <i>pdif</i> -9                 | <u>ACTTCGCATAA</u> CGCCCA <u>TTATGTTAATT</u>    | 49,053-49,080                  |
| <i>pdif</i> -10*               | <u>ATTTTCGTATAA</u> CCGCCA <u>TTATGTTAAGT</u>   | 49,695-49,722                  |
| <i>pdif</i> -11                | <u>ATTTTCGTATAA</u> GGTGT <u>TTATGTTAATT</u>    | 50,419-50,446                  |
| <i>pdif</i> -12*               | <u>GTTTCGCATAA</u> CAGCCA <u>TTATGTTAAAT</u>    | 54,060-54,087                  |
| <i>pdif</i> -13                | <u>ATTTTCGTATAA</u> GGTGT <u>TTATGTTAATT</u>    | 56,277-56,304                  |
| <i>pdif</i> -14*               | <u>ACTTCACATAA</u> GAAATT <u>TTATGTTAAAT</u>    | 59,255-59,282                  |
| <i>pdif</i> -15                | <u>ATTTTCGCATAA</u> GAGATT <u>TTATGTTAAAT</u>   | 98,080- 98,107                 |
| <i>pdif</i> -16                | <u>GTTTCGTATAA</u> GCTCTA <u>TTATGTTAAAT</u>    | 98,970-98,997                  |
| <i>pdif</i> -17*               | <u>ATTTTCGTATAA</u> GGTGT <u>TTATGTTAATT</u>    | 102,476-102,503                |

a. The *pdif* site (XerD-XerC) is listed as reverse complementary sequence and was indicated with asterisk.

b. The XerC binding site is shown in blue color, and the XerD binding site is shown in red color. The consensus sequence is underlined.

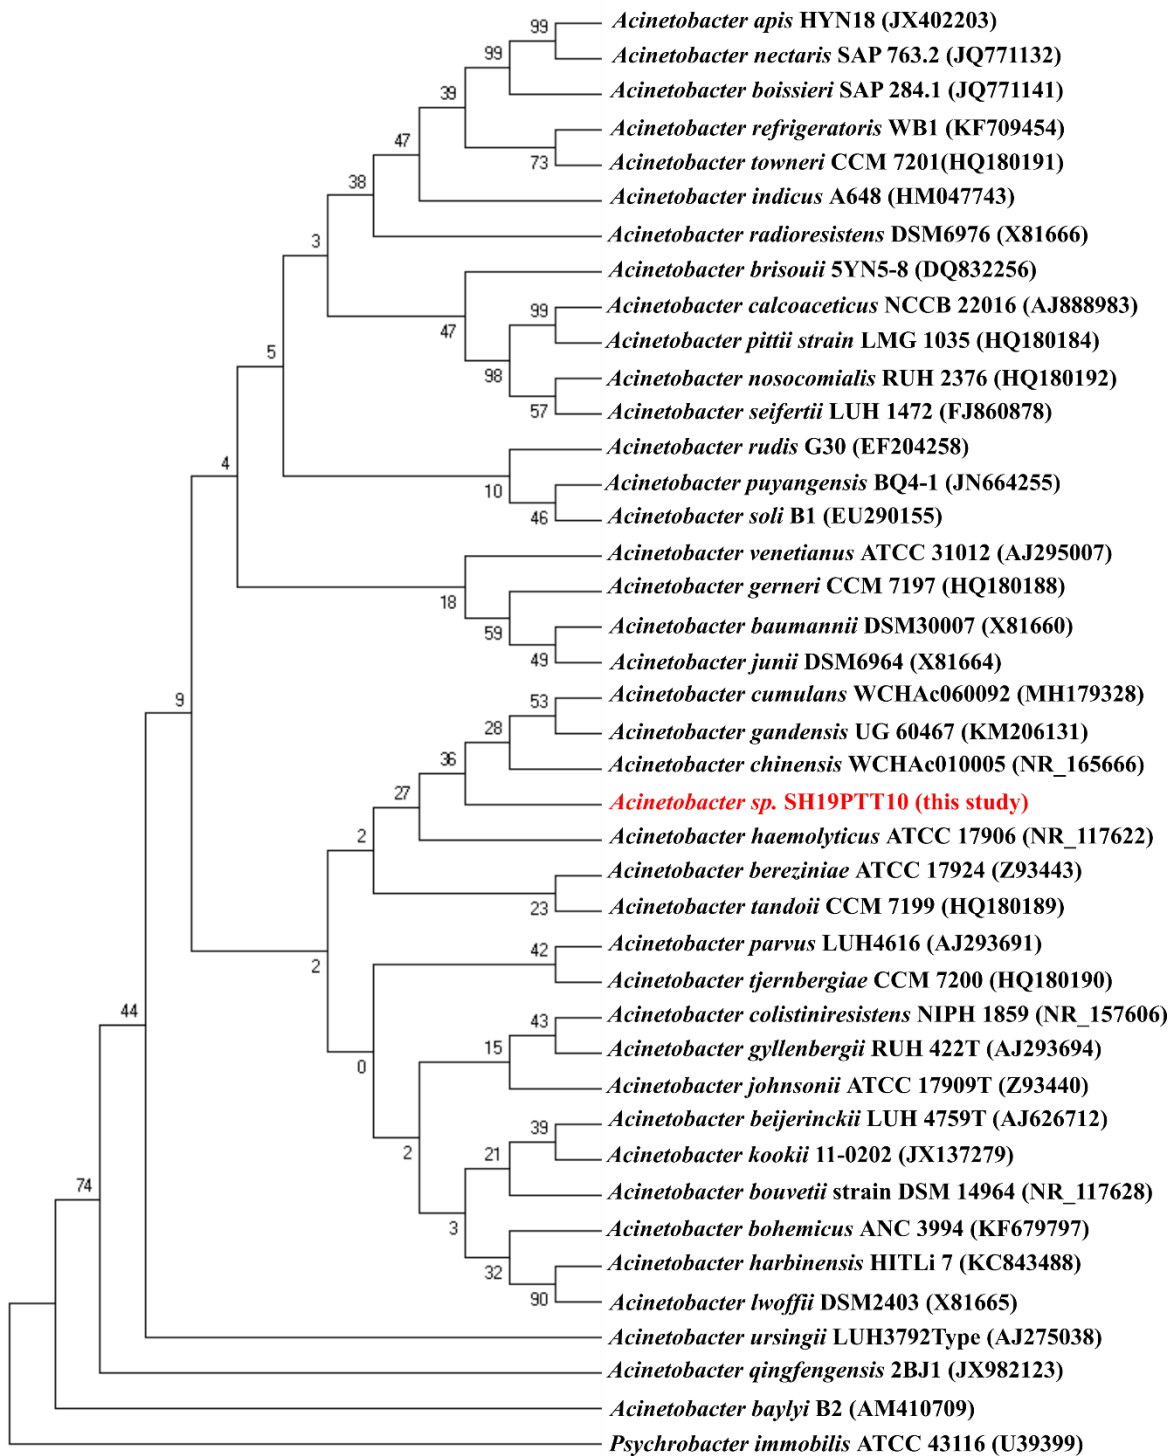

**Figure S1** Neighbour-joining phylogenetic reconstruction from 16S rRNA gene sequences of SH19PTT10 and other representatives across the genus *Acinetobacter*. The percentage of replicate trees in which the associated taxa clustered together in the bootstrap test (1000 replicates) is shown next to the branches. *Psychrobacter immobilis* ATCC 43116 (GenBank accession no. U39399) was used as an outgroup.

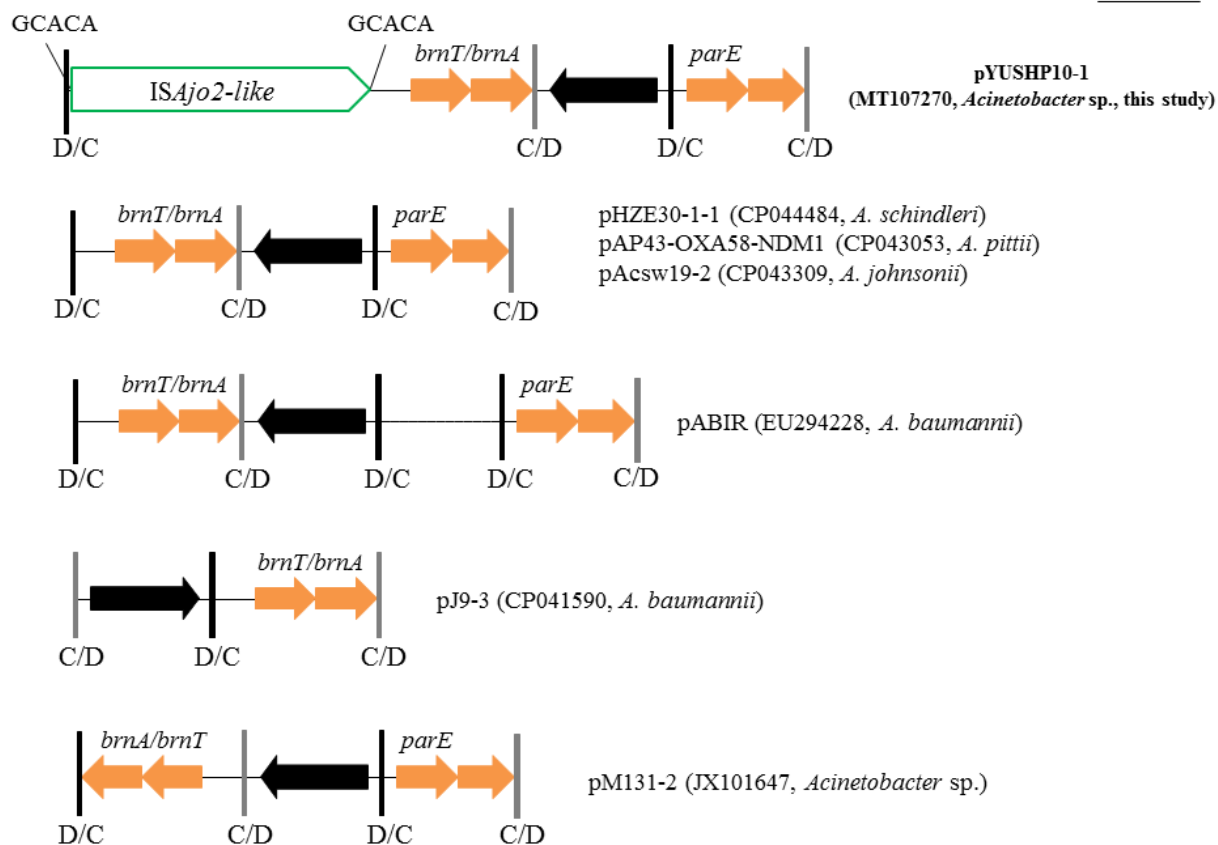

**Figure S2** Comparison of sequences containing *brnT/brnA dif* module. Arrows indicate the extent and direction of genes. The hypothetical protein is shown in black color. The toxin-antitoxin system is shown in orange color. IS element is shown as box labeled with its name. Direct repeats are indicated by arrows and sequences. Vertical bars in black color indicate *pdif* sites (XerD-XerC) and vertical bars in grey color indicate *pdif* sites (XerD-XerC).
